# Supplementary material for: Blood-derived mitochondrial DNA copy number is associated with gene expression across multiple tissues and is predictive for incident neurodegenerative disease
Source: HighWire-hosted journal article supplement (doi:10.1101/gr.269381.120), 2021-01-13
Supplement: Supplemental_Files.docx [file Supplemental_Files.docx]

**Supplemental_Fig_S1.png**


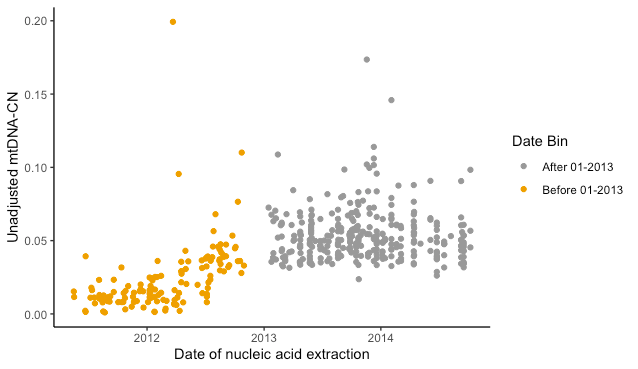


**Supplemental Fig S1. mtDNA-CN is affected by nucleic acid extraction date**

mtDNA-CN exhibits a batch effect associated with nucleic acid extraction date. The batch effect was identified using GTEx version 7 data (phs000424.v7.p2). All subsequent analyses were done with version 8, and version 8 whole genome sequences extracted prior to January 2013 were not downloaded.

**Supplemental_Fig_S2.png**


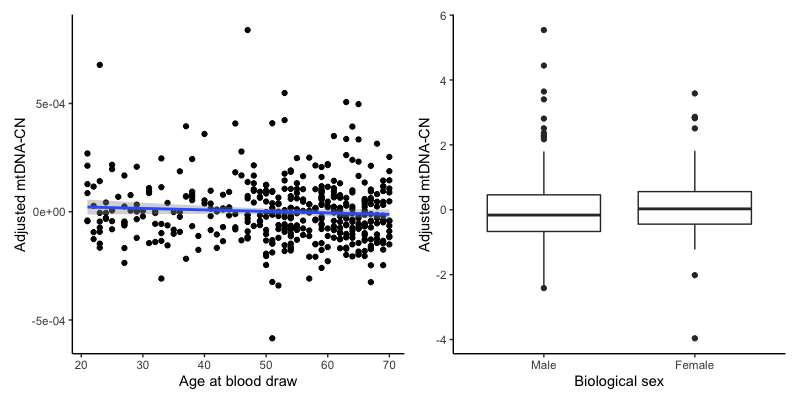


**Supplemental Fig S2. mtDNA-CN in GTEx is associated with known covariates**

Adjusted mtDNA-CN in GTEx decreases with age (p = 0.18) and is lower in males (p = 0.14) when compared to females. mtDNA-CN has been corrected for all other variables (age, sex, cohort, ischemic time, and cell counts deconvoluted from blood RNA-sequencing) except for the variable of interest.

**Supplemental_Fig_S3.png**

**
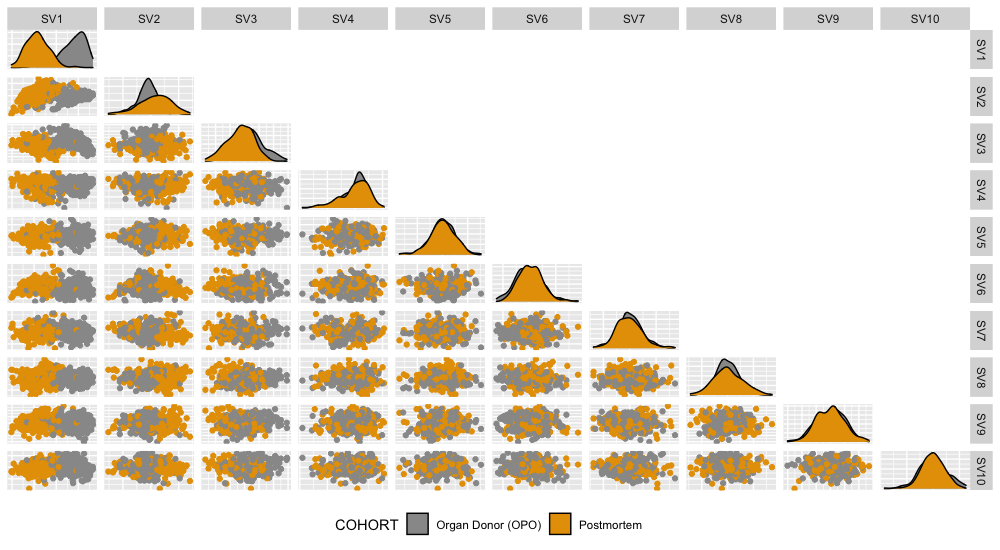
**

**Supplemental Fig S3. Surrogate variables reveal known RNA-sequencing covariates**

Surrogate variables 1 and 2 derived from whole blood RNA-sequencing capture cohort effects. Pairwise plots for the top 10 surrogate variables derived from whole blood RNA-sequencing, colored by cohort. Surrogate variables are protected from mtDNA-CN.

**Supplemental_Fig_S4.pdf**

**Supplemental Fig S4. mtDNA-CN is associated with mitochondrial gene expression.**

Forest plot of associations between blood-derived mtDNA-CN and mtDNA-encoded gene expression in whole. Effect size estimates reflect the change in standard deviations for gene expression per standard deviation in mtDNA-CN.

**Supplemental_Fig_S5.png**

**
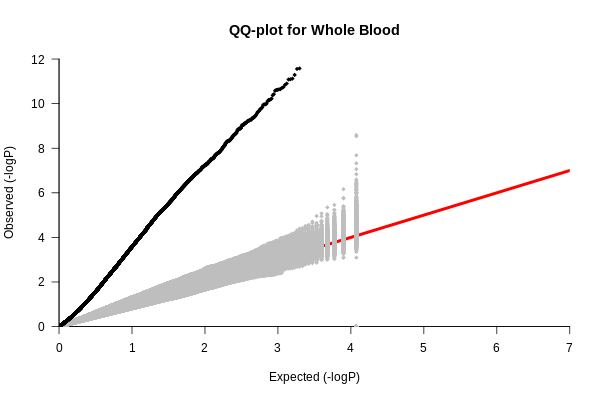
**

**Supplemental Fig S5. P-value QQ-plot of associations between blood-derived gene expression and blood-derived mtDNA-CN**

Inflation of test statistics from multiple linear regressions between gene expression in whole blood and blood-derived mtDNA-CN (black). Results from 1000 two-stage permutations (in gray) show no inflation of test statistics.

**Supplemental_Fig_S6.png**

**
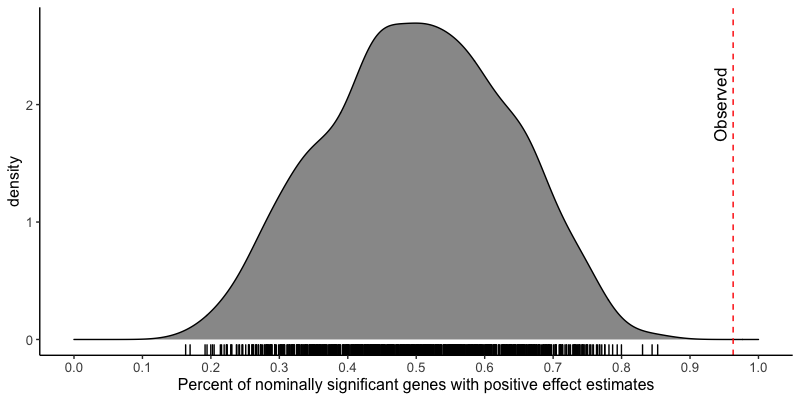
**

**Supplemental Fig S6. Positive shift for effect size estimates between blood-derived mtDNA-CN and blood-derived gene expression.**

Effect size estimates between blood-derived mtDNA-CN and gene expression in blood are significantly positively shifted. Shown in gray is the percent of nominally significant genes that were positive from multiple linear regressions between blood-derived mtDNA-CN and gene expression in whole blood for 1000 permuted datasets. Dashed red line represents the actual observed value.

**Supplemental_Fig_S7.png**


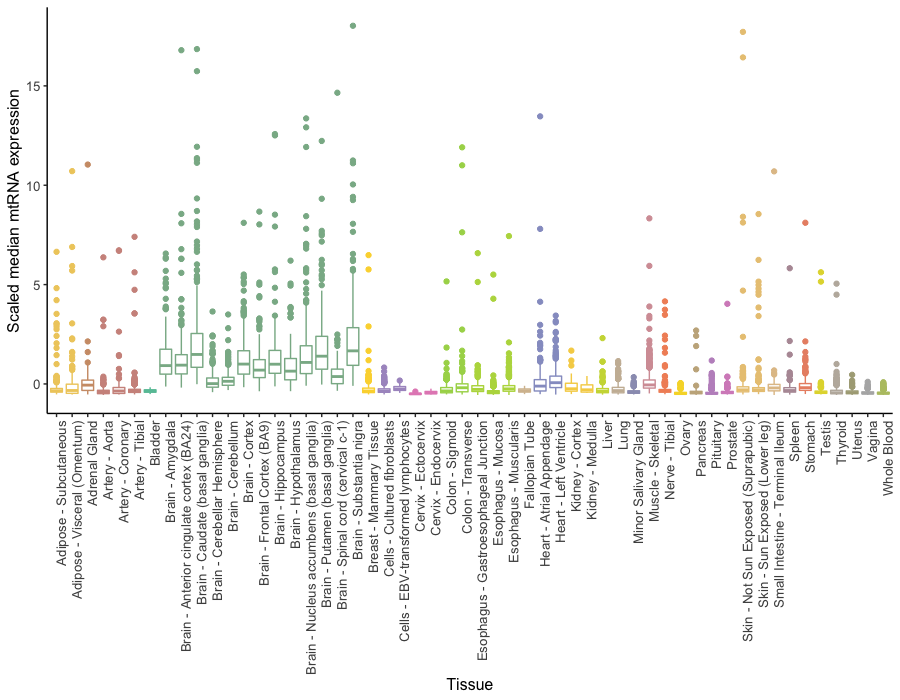


**Supplemental Fig S7. Scaled median mtRNA gene expression across tissues.**

Median mtRNA gene expression was scaled and tabulated by tissue. mtRNA gene expression varies widely between tissues, with notably higher expression in brain tissues.

**Supplemental_Fig_S8.**


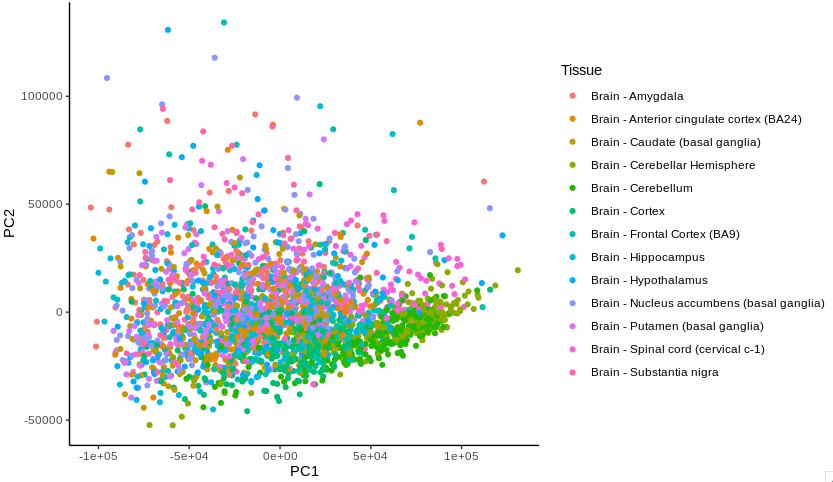


**Supplemental Fig S8. Principal components analysis of brain tissues**

Principal components 1 and 2 from a principal components analysis of RNA-sequencing from all brain tissues. Substantia nigra does not appear to be substantially different from the other brain tissues.

**Supplemental_Fig _S9.pdf**

**Supplemental Fig S9. ELK1 is associated with mtDNA-CN in multiple tissues**

ELK1 is nominally significantly associated with mtDNA-CN 4 out of the 18 tissues where ELK1 targets are enriched for association with mtDNA-CN. N represents number of samples for each tissue. Summary estimates calculated using a random-effects meta-analysis, excluding the effect of whole blood.

**Supplemental_Fig_S10.svg**


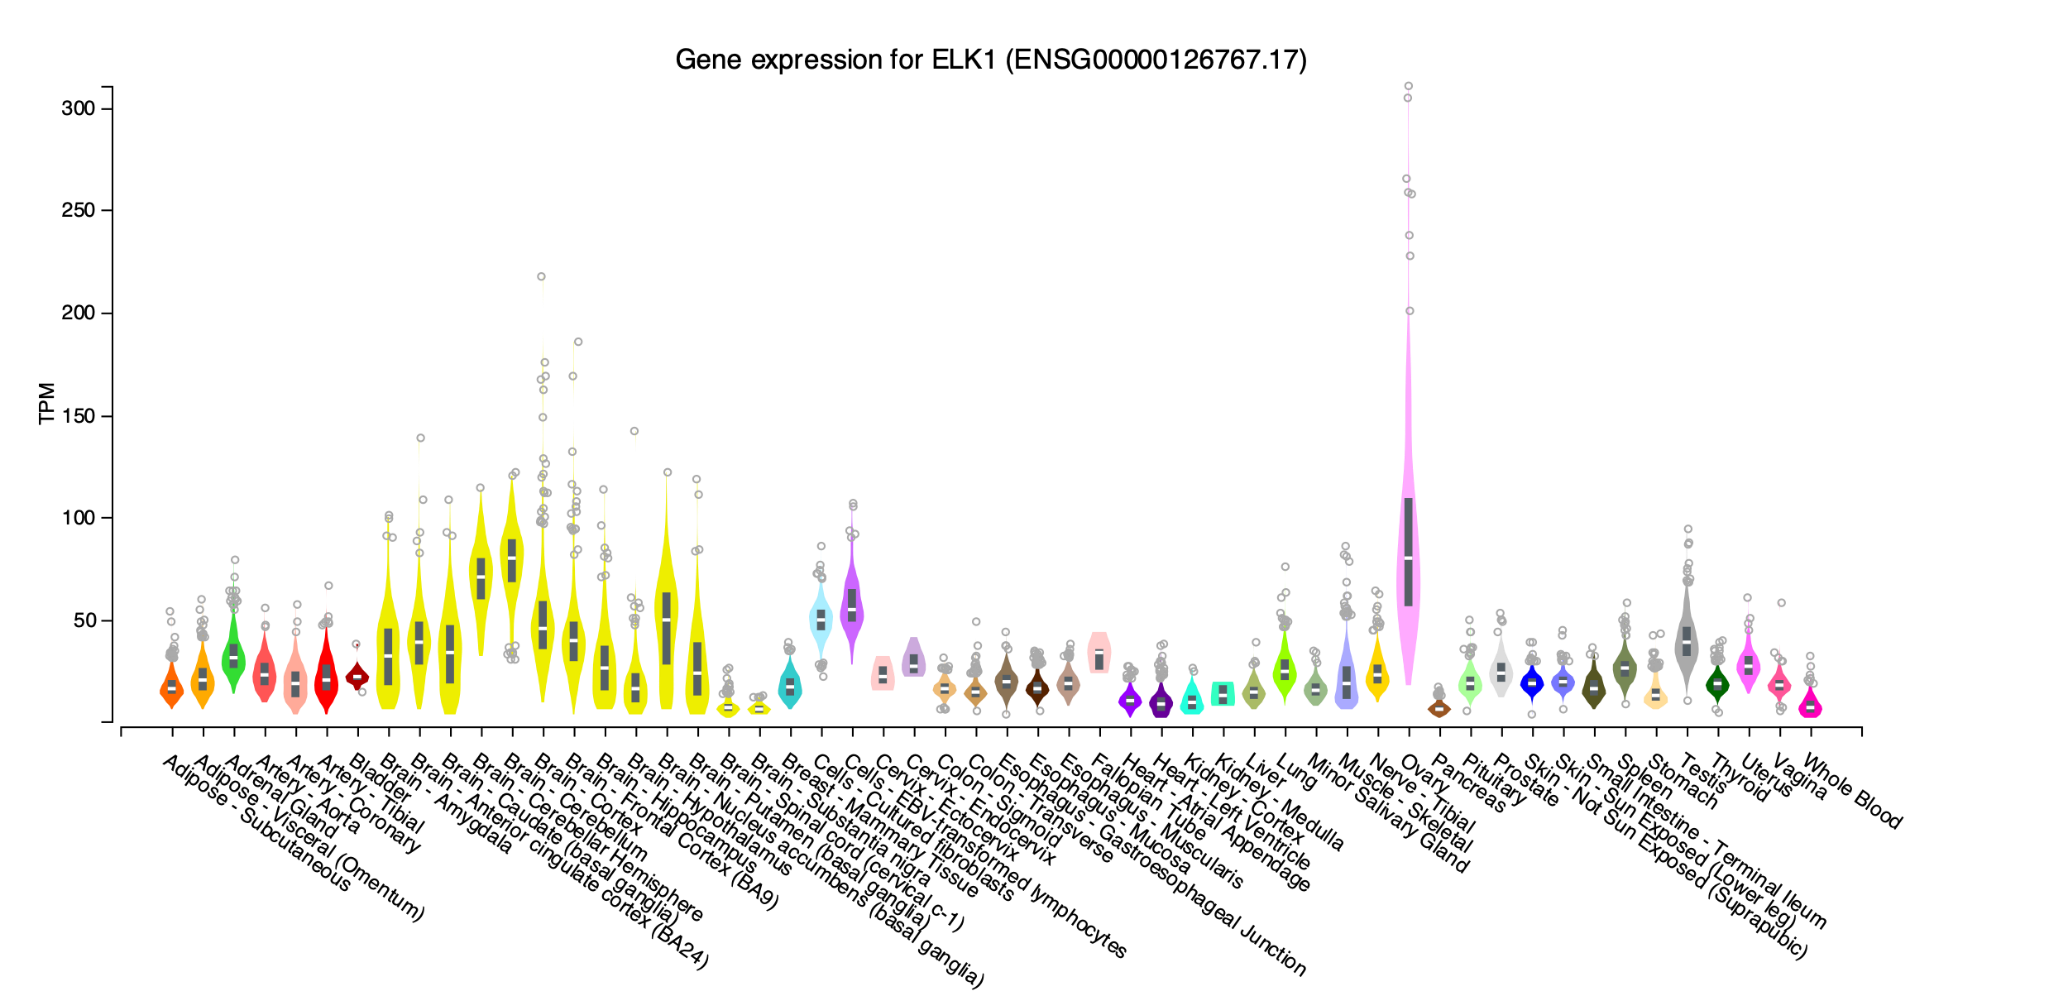


**Supplemental Fig S10.**

GTEx visualization showing gene expression of ELK1 in multiple tissues, downloaded on 5/9/2020 from <https://gtexportal.org/home/gene/ELK1>.

**Supplemental_Fig_S11.pdf**

**
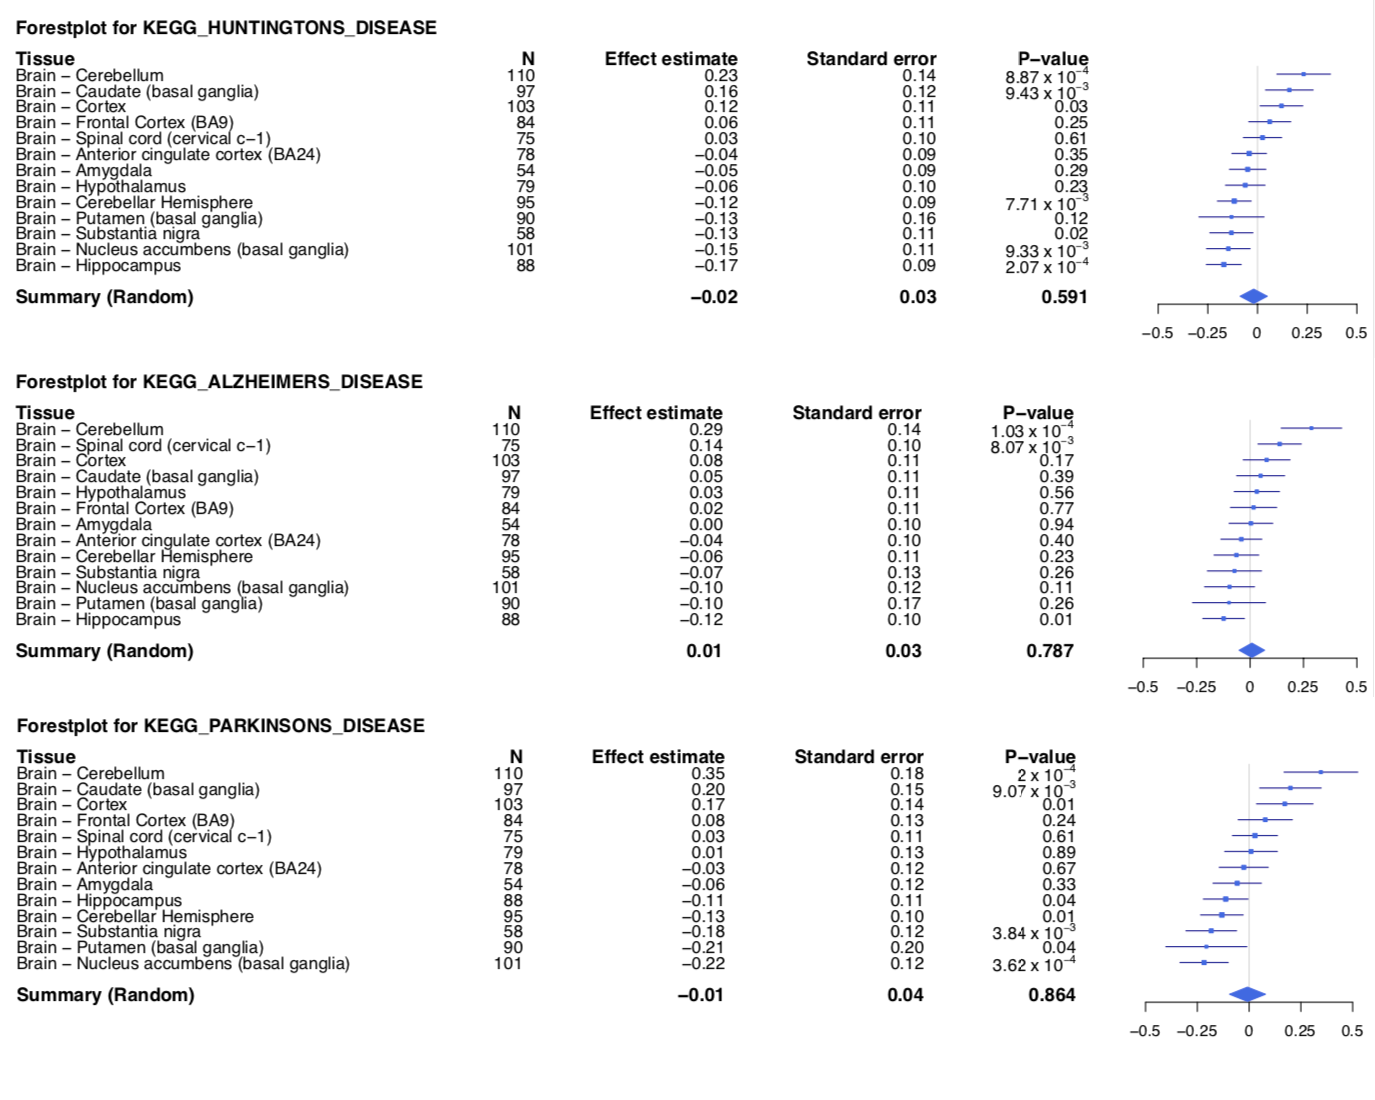
**

**Supplemental Fig S11.**

Forest plots showing enrichment for neurodegenerative disease gene sets across multiple brain tissues.

**Supplemental_Fig_S12.png**


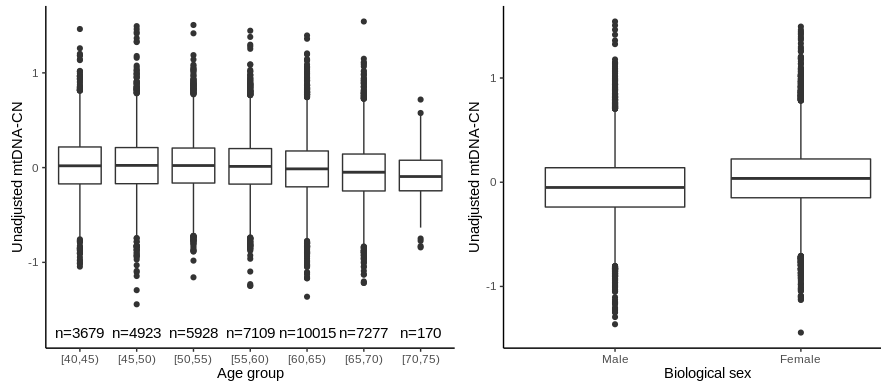


**Supplemental Fig S12.**

mtDNA-CN in UKBiobank decreases with age (p = 2.12e-60) and is lower in males when compared to females (p = 1.56e-182). Data has been stratified into 5-year age bins.

**Supplemental_Fig_S13.png**

**Supplemental Fig S13.**

Filtering pipeline for whole blood analysis and the number of individuals retained at each step.

**Supplemental Table S1. GTEx effect size estimates between mtDNA-CN and known correlates are comparable to ARIC mtDNA-CN effect size estimates from previous literature. Power calculations are based on R2 values between ARIC mtDNA-CN and correlates.**

|  | **GTEx** | | |  | **ARIC** | | |  |  |
| --- | --- | --- | --- | --- | --- | --- | --- | --- | --- |
|  | **Effect estimate** | **Standard error** | **P-value** |  | **Effect estimate** | **Standard error** | **P-value** |  | **Power** |
| Age | -0.06 | 0.05 | 0.18 |  | -0.02 | 0.005 | 0.004 |  | 28.68% |
| Sex (Female) | 0.15 | 0.1 | 0.14 |  | 0.46 | 0.06 | 9.95×10-14 |  | 79.44% |
| Neutrophils | -0.19 | 0.05 | 8.4×10-5 |  | -0.14 | 0.02 | 9.97×10-16 |  | 97.48% |

**Supplemental Table S2. Scaled median mtRNA expression in non-blood tissues does not seem to be significantly associated with blood-derived mtDNA-CN. Only Uterus and Heart – Left Ventricle pass nominal significant (p<0.05) for associations between blood-derived mtDNA-CN and tissue-specific mtRNA expression.**

| **Tissue** | **Effect size estimate** | **Standard error** | **P-value** |
| --- | --- | --- | --- |
| Whole Blood | 0.15 | 0.03 | 9.10×10-9 |
| Uterus | 0.29 | 0.09 | 0.004 |
| Heart - Left Ventricle | 0.12 | 0.05 | 0.017 |
| Skin - Sun Exposed (Lower leg) | -0.05 | 0.03 | 0.055 |
| Heart - Atrial Appendage | 0.07 | 0.04 | 0.084 |
| Artery - Tibial | 0.05 | 0.03 | 0.111 |
| Brain - Cerebellum | 0.07 | 0.05 | 0.130 |
| Esophagus - Mucosa | 0.06 | 0.04 | 0.156 |
| Cells - Cultured fibroblasts | -0.07 | 0.05 | 0.177 |
| Breast - Mammary Tissue | 0.05 | 0.04 | 0.185 |
| Artery - Aorta | 0.04 | 0.03 | 0.194 |
| Brain - Putamen (basal ganglia) | -0.05 | 0.04 | 0.207 |
| Brain - Cortex | 0.06 | 0.05 | 0.216 |
| Nerve - Tibial | 0.04 | 0.03 | 0.237 |
| Colon - Transverse | 0.04 | 0.04 | 0.241 |
| Minor Salivary Gland | 0.09 | 0.09 | 0.292 |
| Stomach | 0.06 | 0.06 | 0.292 |
| Thyroid | 0.03 | 0.03 | 0.294 |
| Pancreas | 0.08 | 0.08 | 0.317 |
| Testis | 0.05 | 0.05 | 0.318 |
| Esophagus - Gastroesophageal Junction | -0.04 | 0.05 | 0.427 |
| Brain - Nucleus accumbens (basal ganglia) | 0.04 | 0.05 | 0.443 |
| Brain - Caudate (basal ganglia) | 0.03 | 0.04 | 0.515 |
| Adrenal Gland | 0.05 | 0.07 | 0.530 |
| Lung | 0.02 | 0.04 | 0.566 |
| Esophagus - Muscularis | 0.02 | 0.04 | 0.576 |
| Colon - Sigmoid | 0.02 | 0.03 | 0.584 |
| Cells - EBV-transformed lymphocytes | 0.08 | 0.16 | 0.609 |
| Brain - Anterior cingulate cortex (BA24) | -0.02 | 0.05 | 0.635 |
| Muscle - Skeletal | -0.01 | 0.03 | 0.667 |
| Brain - Substantia nigra | 0.03 | 0.08 | 0.671 |
| Spleen | 0.02 | 0.06 | 0.671 |
| Pituitary | 0.02 | 0.05 | 0.673 |
| Brain - Amygdala | 0.03 | 0.07 | 0.704 |
| Vagina | 0.03 | 0.09 | 0.710 |
| Skin - Not Sun Exposed (Suprapubic) | 0.01 | 0.02 | 0.758 |
| Liver | 0.02 | 0.06 | 0.763 |
| Brain - Hippocampus | -0.01 | 0.05 | 0.767 |
| Small Intestine - Terminal Ileum | 0.01 | 0.06 | 0.798 |
| Brain - Cerebellar Hemisphere | -0.01 | 0.06 | 0.817 |
| Artery - Coronary | -0.01 | 0.04 | 0.849 |
| Brain - Frontal Cortex (BA9) | 0.01 | 0.05 | 0.869 |
| Brain - Hypothalamus | -0.01 | 0.06 | 0.873 |
| Adipose - Subcutaneous | 0.00 | 0.03 | 0.897 |
| Prostate | -0.00 | 0.06 | 0.980 |
| Adipose - Visceral (Omentum) | -0.00 | 0.03 | 0.993 |
| Brain - Spinal cord (cervical c-1) | 0.00 | 0.06 | 0.997 |
| Ovary | 0.00 | 0.08 | 0.999 |

**Supplemental Table S3. Genomic inflation factors for all tested tissues, represented by the median observed chi-squared value divided by the median expected chi-squared value. Bolded tissues pass the permuted genomic inflation factor cutoff and represent tissues with significant signal.**

| **Tissue** | **Lambda** |
| --- | --- |
| **Whole Blood** | **4.71** |
| **Brain - Putamen (basal ganglia)** | **3.36** |
| **Brain - Substantia nigra** | **1.69** |
| **Colon - Transverse** | **1.61** |
| **Nerve - Tibial** | **1.56** |
| **Esophagus - Mucosa** | **1.51** |
| **Skin - Sun Exposed (Lower leg)** | **1.49** |
| **Brain - Hippocampus** | **1.48** |
| **Testis** | **1.45** |
| **Brain - Nucleus accumbens (basal ganglia)** | **1.45** |
| **Adipose - Subcutaneous** | **1.43** |
| **Colon - Sigmoid** | **1.41** |
| **Esophagus - Muscularis** | **1.41** |
| **Breast - Mammary Tissue** | **1.37** |
| **Brain - Hypothalamus** | **1.35** |
| **Skin - Not Sun Exposed (Suprapubic)** | **1.33** |
| **Muscle - Skeletal** | **1.32** |
| **Brain - Cerebellum** | **1.32** |
| **Heart - Left Ventricle** | **1.31** |
| **Vagina** | **1.30** |
| **Spleen** | **1.29** |
| **Lung** | **1.28** |
| **Pancreas** | **1.28** |
| **Adrenal Gland** | **1.27** |
| **Adipose - Visceral (Omentum)** | **1.26** |
| **Thyroid** | **1.26** |
| **Brain - Cortex** | **1.26** |
| **Esophagus - Gastroesophageal Junction** | **1.25** |
| **Heart - Atrial Appendage** | **1.24** |
| **Brain - Caudate (basal ganglia)** | **1.24** |
| **Liver** | **1.23** |
| Stomach | 1.19 |
| Brain - Spinal cord (cervical c-1) | 1.18 |
| Small Intestine - Terminal Ileum | 1.17 |
| Brain - Cerebellar Hemisphere | 1.15 |
| Artery - Tibial | 1.14 |
| Pituitary | 1.14 |
| Artery - Aorta | 1.13 |
| Brain - Frontal Cortex (BA9) | 1.12 |
| Prostate | 1.11 |
| Ovary | 1.07 |
| Minor Salivary Gland | 1.06 |
| Cells - Cultured fibroblasts | 1.03 |
| Brain - Anterior cingulate cortex (BA24) | 1.02 |
| Artery - Coronary | 1.01 |
| Brain - Amygdala | 0.973 |
| Uterus | 0.928 |
| Cells - EBV-transformed lymphocytes | 0.835 |

**Supplemental Table S4. Spearman’s rank correlation coefficients between blood estimates and specific tissue estimates for all 700 genes that were significant in blood. Average baseline correlation is represented by the correlation for 1000 randomly selected gene sets (700 genes per set). Tissues with correlations significantly different from baseline are bolded.**

| **Tissue** | **Spearman correlation for significant blood genes** | **Average spearman correlation for 1000 permuted random gene sets** | **95% Confidence Interval** |
| --- | --- | --- | --- |
| Adipose - Subcutaneous | 0.180 | 0.107 | 0.030;0.184 |
| **Adipose - Visceral (Omentum)** | **0.259** | **0.151** | **0.075;0.227** |
| **Adrenal Gland** | **0.188** | **0.092** | **0.015;0.169** |
| Artery - Aorta | 0.179 | 0.107 | 0.030;0.184 |
| **Artery - Coronary** | **0.008** | **0.097** | **0.016;0.178** |
| **Artery - Tibial** | **0.179** | **0.101** | **0.024;0.179** |
| Brain - Amygdala | 0.082 | 0.067 | -0.013;0.147 |
| Brain - Anterior cingulate cortex (BA24) | 0.080 | 0.023 | -0.060;0.106 |
| Brain - Caudate (basal ganglia) | 0.106 | 0.061 | -0.019;0.141 |
| **Brain - Cerebellar Hemisphere** | **0.136** | **0.052** | **-0.029;0.133** |
| **Brain - Cerebellum** | **0.192** | **0.106** | **0.027;0.186** |
| **Brain - Cortex** | **0.149** | **0.052** | **-0.032;0.135** |
| **Brain - Frontal Cortex (BA9)** | **0.188** | **0.039** | **-0.040;0.118** |
| **Brain - Hippocampus** | **0.139** | **0.025** | **-0.058;0.108** |
| **Brain - Hypothalamus** | **0.185** | **0.058** | **-0.023;0.139** |
| **Brain - Nucleus accumbens (basal ganglia)** | **0.224** | **0.055** | **-0.025;0.134** |
| Brain - Putamen (basal ganglia) | 0.128 | 0.091 | 0.012;0.170 |
| Brain - Spinal cord (cervical c-1) | 0.096 | 0.095 | 0.018;0.172 |
| **Brain - Substantia nigra** | **0.159** | **0.013** | **-0.068;0.094** |
| **Breast - Mammary Tissue** | **0.313** | **0.144** | **0.068;0.220** |
| Cells - Cultured fibroblasts | -0.052 | -0.041 | -0.124;0.041 |
| Cells - EBV-transformed lymphocytes | -0.045 | 0.028 | -0.050;0.105 |
| Colon - Sigmoid | 0.111 | 0.136 | 0.058;0.214 |
| **Colon - Transverse** | **0.212** | **0.107** | **0.034;0.180** |
| Esophagus - Gastroesophageal Junction | 0.121 | 0.091 | 0.012;0.170 |
| Esophagus - Mucosa | 0.150 | 0.164 | 0.088;0.239 |
| Esophagus - Muscularis | 0.150 | 0.136 | 0.060;0.212 |
| **Heart - Atrial Appendage** | **0.203** | **0.120** | **0.041;0.199** |
| Heart - Left Ventricle | 0.265 | 0.189 | 0.105;0.273 |
| Kidney - Cortex | 0.061 | 0.118 | 0.043;0.192 |
| **Liver** | **0.174** | **0.072** | **-0.008;0.152** |
| **Lung** | **0.245** | **0.168** | **0.091;0.245** |
| Minor Salivary Gland | 0.115 | 0.105 | 0.027;0.183 |
| Muscle - Skeletal | 0.184 | 0.158 | 0.079;0.237 |
| **Nerve - Tibial** | **0.250** | **0.080** | **0.006;0.155** |
| **Ovary** | **0.097** | **-0.034** | **-0.112;0.044** |
| **Pancreas** | **0.263** | **0.092** | **0.012;0.171** |
| **Pituitary** | **0.268** | **0.088** | **0.009;0.167** |
| Prostate | 0.146 | 0.108 | 0.029;0.187 |
| Skin - Not Sun Exposed (Suprapubic) | 0.214 | 0.144 | 0.068;0.220 |
| **Skin - Sun Exposed (Lower leg)** | **0.073** | **0.160** | **0.085;0.234** |
| Small Intestine - Terminal Ileum | 0.192 | 0.164 | 0.088;0.239 |
| **Spleen** | **0.236** | **0.125** | **0.049;0.200** |
| Stomach | 0.198 | 0.136 | 0.058;0.214 |
| **Testis** | **0.077** | **0.154** | **0.079;0.229** |
| **Thyroid** | **0.055** | **0.144** | **0.069;0.219** |
| Uterus | 0.133 | 0.090 | 0.015;0.166 |
| **Vagina** | **0.176** | **0.049** | **-0.028;0.126** |
